# Supplementary material
Source: PubMed Central journal article supplement (PMC3478412)
Supplement: NIHMS403469-supplement-1.pdf [file NIHMS403469-supplement-1.pdf]

Supplementary Figure 1.

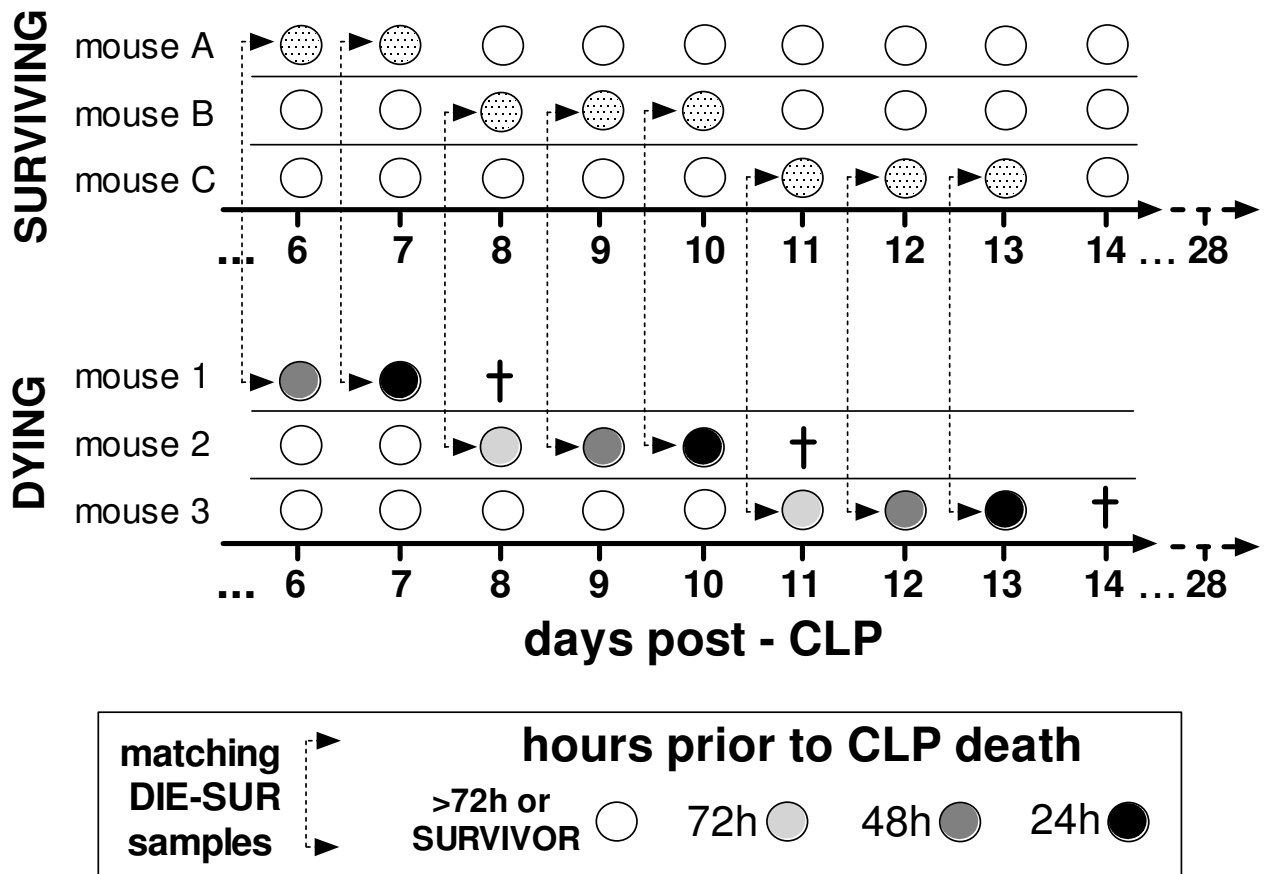

Supplementary Figure 1 - Legend:

**Schematic of the chronic sepsis study design.**

Daily blood samples were collected between days 6-28 post-CLP (chronic phase of sepsis). The day of death (any day between 6-28 days) served as the reference point for any DIE mouse. Regardless of the day of death, all DIE values were retrospectively tallied together and plotted in the 72h, 48h and 24h prior-to-death trajectory. Each data set (typically 72h, 48h and 24h time-points) collected from a DIE mouse (e.g. mouse 2) was time-matched with the same number of values collected from a random SUR mouse (e.g. mouse B) on the same post-CLP days. For simplicity, a 1:1 ratio is indicated in the schematic. The true SUR-to-DIE ratio in the study was 2:1 for each time-point/parameter.
