# Supplementary material
Source: PubMed Central journal article supplement (PMC3478412)
Supplement: NIHMS403469-supplement-3.pdf [file NIHMS403469-supplement-3.pdf]

**Supplementary Table I.** Comparison of circulating pro-inflammatory cytokine concentrations between mice dying<sup>b</sup> and surviving during the chronic phase of sepsis

| <b>Cytokine<sup>a</sup> (ng/ml)</b> | <b>Dying<sup>b</sup></b>     | <b>Surviving<sup>c</sup></b> |
|-------------------------------------|------------------------------|------------------------------|
| Interleukin (IL)-1 $\beta$          | 1.02 $\pm$ 2.4               | 0.17 $\pm$ 0.3               |
| IL-2                                | 1.05 $\pm$ 1.3*              | 0.10 $\pm$ 0.3               |
| IL-5                                | 0.24 $\pm$ 0.37              | 0.05 $\pm$ 0.6               |
| IL-6                                | 5.52 $\pm$ 15.6*             | 0.03 $\pm$ 0.1               |
| IL-12                               | 0.58 $\pm$ 1.1 <sup>#</sup>  | 0.02 $\pm$ 0.03              |
| IL-17                               | 0.27 $\pm$ 0.48*             | 0.02 $\pm$ 0.04              |
| TNF $\alpha$                        | 0.15 $\pm$ 0.21*             | 0.01 $\pm$ 0.04              |
| IFN $\gamma$                        | 0.52 $\pm$ 0.90*             | 0.04 $\pm$ 0.04              |
| ICAM-1                              | 7.75 $\pm$ 4.2*              | 4.33 $\pm$ 2.4               |
| MIP-1 $\alpha$                      | 11.1 $\pm$ 18.4*             | 0.45 $\pm$ 0.7               |
| MIP-2                               | 3.60 $\pm$ 6.7*              | 0.08 $\pm$ 0.4               |
| MCP-1                               | 3.62 $\pm$ 4.1*              | 0.51 $\pm$ 0.9               |
| Eotaxin                             | 6.72 $\pm$ 13.9 <sup>#</sup> | 2.63 $\pm$ 5.6               |
| Eotaxin-2                           | 4.21 $\pm$ 5.3               | 1.32 $\pm$ 1.3               |

<sup>a</sup> Data were expressed as the mean  $\pm$  standard deviation (SD). To increase statistical power, data from the current and previous (25) chronic sepsis study were combined for several cytokines: DIE n=29 (IL-1 $\beta$ , IL-6, TNF $\alpha$ , MIP-2, MCP-1, Eotaxin) and n=15 (IL-2, IL-5, IL-12, IL-17, IFN $\gamma$ , ICAM-1, MIP-1 $\alpha$ , Eotaxin-2); Surviving n=58 and 30 (cytokine distribution as in DIE).

<sup>b</sup> Values collected within 24h of chronic death (any 6-28 day post-CLP).

<sup>c</sup> Cytokine values collected from Surviving (two per one dying) animals (alive at day 28 post-CLP) were sampled for comparison on the same post-CLP day as the Dying mice.

\* p<0.01; <sup>#</sup> p<0.05 versus Surviving.
