# Supplementary material
Source: PubMed Central journal article supplement (PMC3478412)
Supplement: NIHMS403469-supplement-4.pdf [file NIHMS403469-supplement-4.pdf]

**Supplementary Table II.** Comparison of circulating anti-inflammatory cytokine concentrations between mice dying <sup>b</sup> and surviving during the chronic phase of sepsis

| <b>Cytokine<sup>a</sup></b> (ng/ml) | <b>Dying<sup>b</sup></b> | <b>Surviving<sup>c</sup></b> |
|-------------------------------------|--------------------------|------------------------------|
| Interleukin (IL)-1ra                | 43.1 ± 48.9*             | 1.71 ± 4.71                  |
| IL-10                               | 1.96 ± 4.81*             | 0.10 ± 0.20                  |
| TNF srI                             | 5.59 ± 11.8*             | 0.88 ± 0.41                  |
| TNF srII                            | 0.29 ± 0.36*             | 0.10 ± 0.06                  |
| IL-4                                | 1.29 ± 2.28 <sup>#</sup> | 0.13 ± 0.15                  |
| IL-13                               | 6.28 ± 11.5              | 0.69 ± 1.09                  |

<sup>a</sup> Data were expressed as the mean ± standard deviation (SD). To increase statistical power, data from the current and previous (25) chronic sepsis study were combined for several cytokines: Dying n=29 (IL-1ra, IL-10, TNF srI, TNF srII) and n=15 (IL-4, IL-13); Surviving n=30 or 58 (distribution as in Dying, respectively);

<sup>b</sup> Values collected within 24h of chronic death (any 6-28 day post-CLP).

<sup>c</sup> Cytokine values collected from Surviving (two per one dying) animals (alive at day 28 post-CLP) were sampled for comparison on the same post-CLP day as the Dying mice.

\* p<0.001; <sup>#</sup> p<0.05 versus Surviving.
